# Supplementary material for: Nonclassical from-shell-to-core growth of hierarchically organized SAPO-11 with enhanced catalytic performance in hydroisomerization of n-heptane
Source: Royal Society of Chemistry journal article supplement (doi:10.1039/c6ra03039d), 2016-01-01
Supplement: c6ra03039d1.pdf [file c6ra03039d1.pdf]

## Electronic Supplementary Information (ESI)

### **Nonclassical from-Shell-to-Core Growth of Hierarchically Organized SAPO-11 with Enhanced Catalytic Performance in Hydroisomerization of n-Heptane**

Dongliang Jin<sup>a</sup>, Zhiting Liu<sup>a</sup>, Jingwei Zheng<sup>a</sup>, Weiming Hua<sup>b\*</sup>, Jiao Chen<sup>a</sup>, Kake Zhu<sup>a\*</sup> and Xinggui Zhou<sup>a</sup>

<sup>a</sup>UNILAB, State Key Laboratory of Chemical Engineering, East China University of Science and Technology, 130 Meilong road, Shanghai 200237, P. R. China

<sup>b</sup>Shanghai Key Laboratory of Molecular Catalysis and Innovative Materials, Department of Chemistry, Fudan University, Shanghai 200433, P. R. China

E-mail: [kakezhu@ecust.edu.cn](mailto:kakezhu@ecust.edu.cn), [wmhua@fudan.edu.cn](mailto:wmhua@fudan.edu.cn)

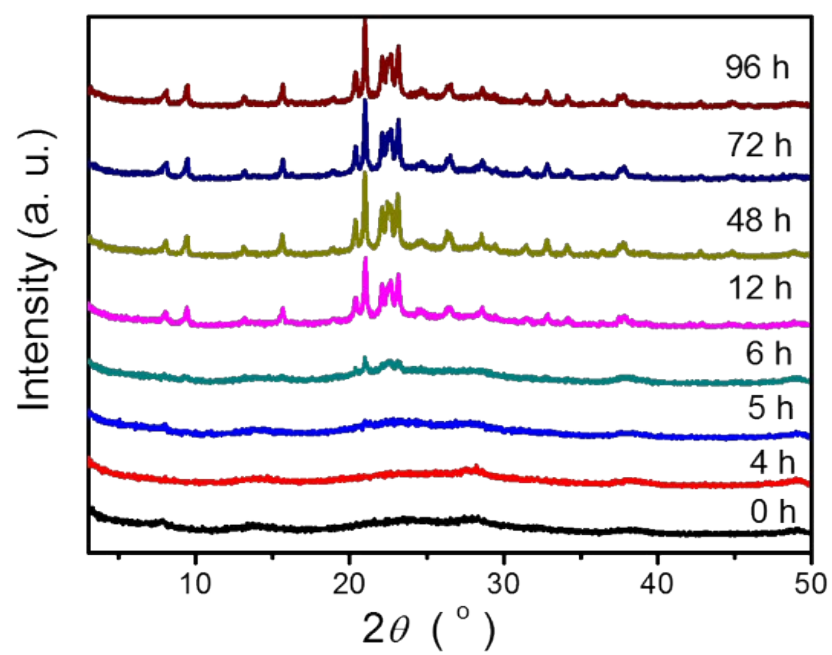

Fig. S1 Time-dependent XRD patterns in the synthesis of SAPO-11-C.

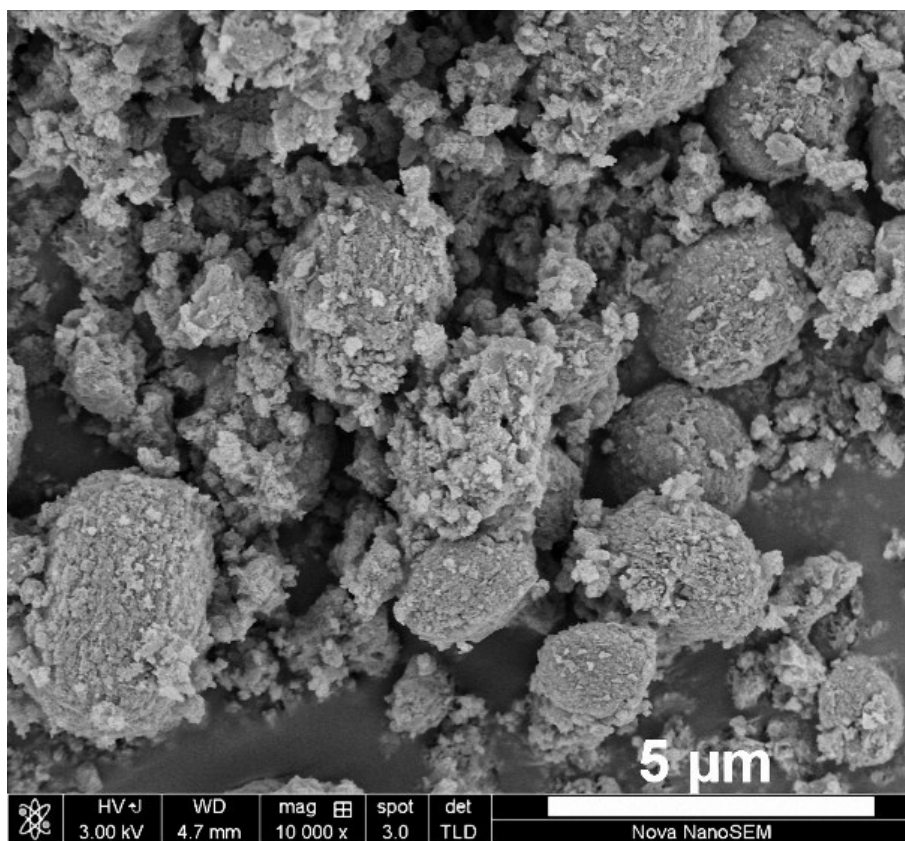

Fig. S2 The panoramic SEM image for crystallization of SAPO-11-H after crystallization of 1 h.

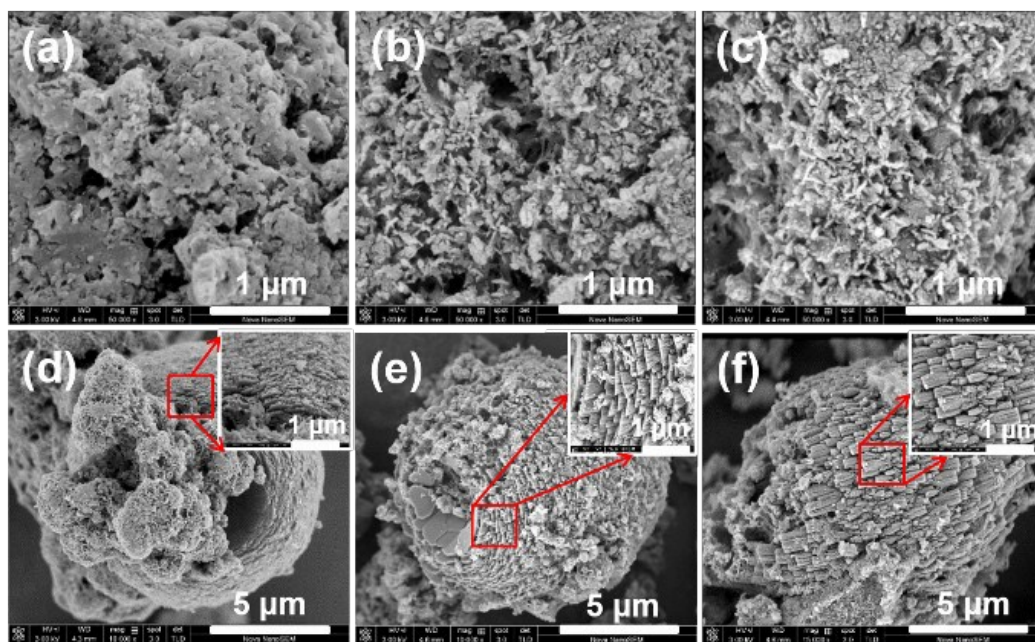

**Fig. S3** The SEM images for samples crystallized for varied time duration in the synthesis of SAPO-11-C. (a) 0 h, (b) 4 h, (c) 5 h, (d) 6 h, (e) 12 h, (f) 96 h.

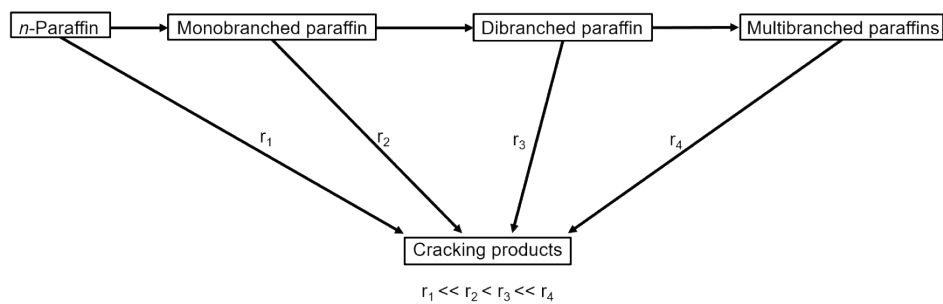

**Fig. S4 Reaction scheme for the formation of isomers and cracking products.  $r$  represents the cracking rate constants (modified from ref. 1, page 609.).**
